# Supplementary material
Source: publisher figshare collection journal article supplement (https://acs.figshare.com/ndownloader/files/3754717)

# ***Supporting Information***

## **Total Synthesis of (+)-Chimonanthine, (+)-Folicanthine, and (-)-Calycanthine**

Ming Ding,<sup>†,‡,§</sup> Kangjiang Liang,<sup>‡,§</sup> Rui Pan,<sup>‡</sup> Hongbin Zhang<sup>\*,†</sup> and Chengfeng Xia<sup>\*,†,‡</sup>

<sup>†</sup>Key Laboratory of Medicinal Chemistry for Natural Resources, Ministry of Education, School of Chemical Science and Technology, Yunnan University, Kunming 650091, China

<sup>‡</sup>State Key Laboratory of Phytochemistry and Plant Resources in West China, Kunming Institute of Botany, Chinese Academy of Sciences, Kunming 650201, China

<sup>§</sup>University of Chinese Academy of Sciences, Beijing 100049, China

### **List of Supporting Information**

**Copies of <sup>1</sup>H NMR and <sup>13</sup>C NMR spectra.....S2-S11**

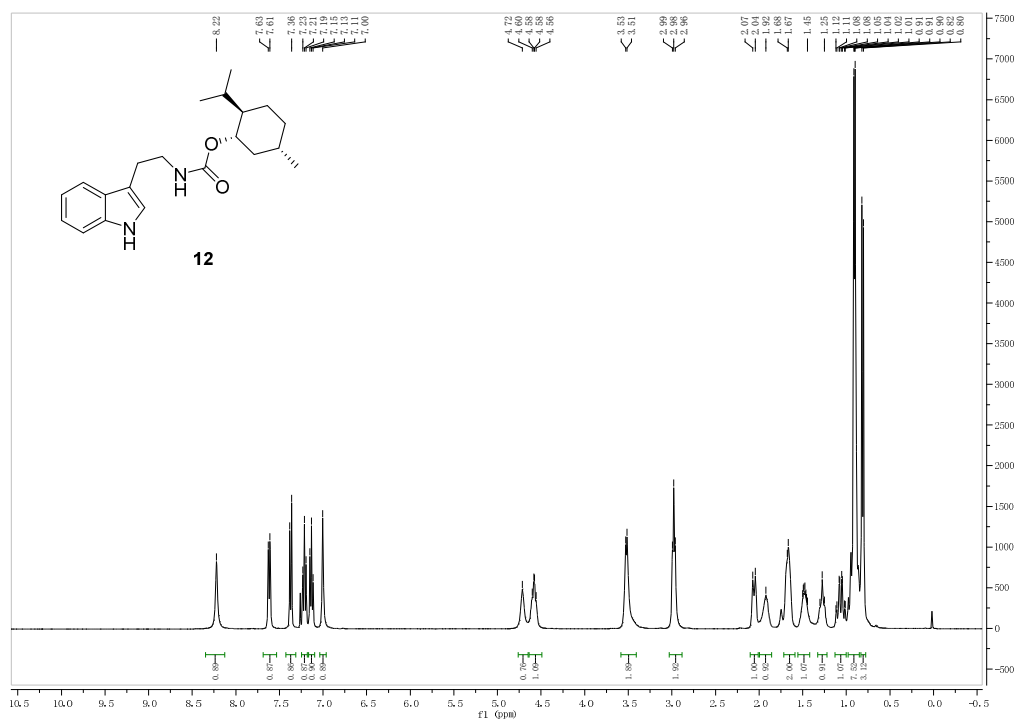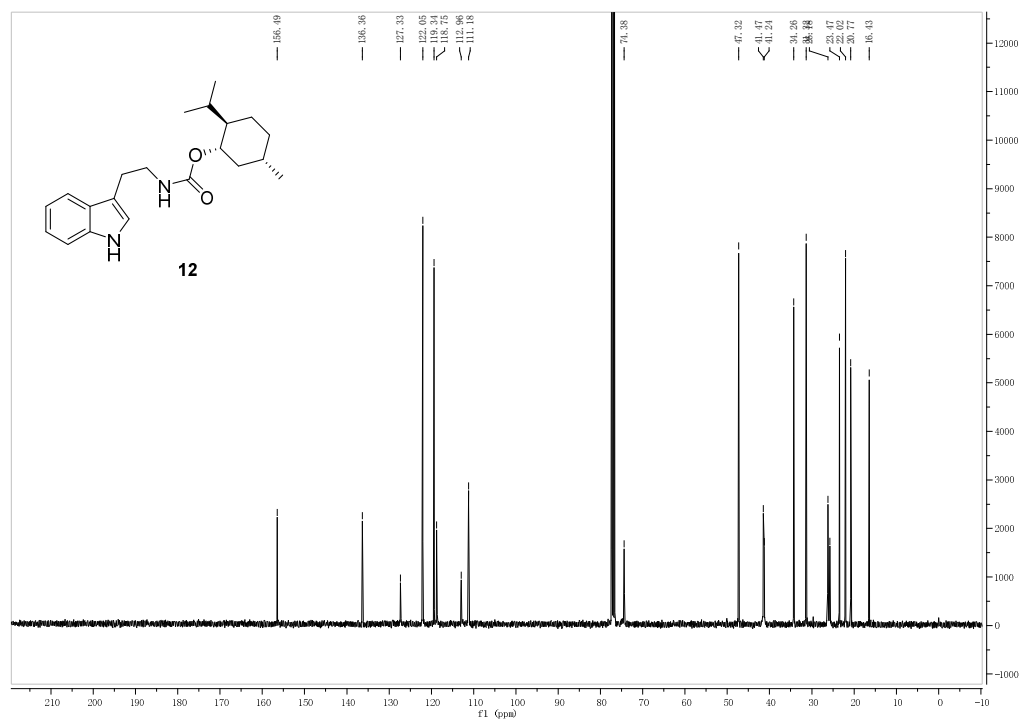

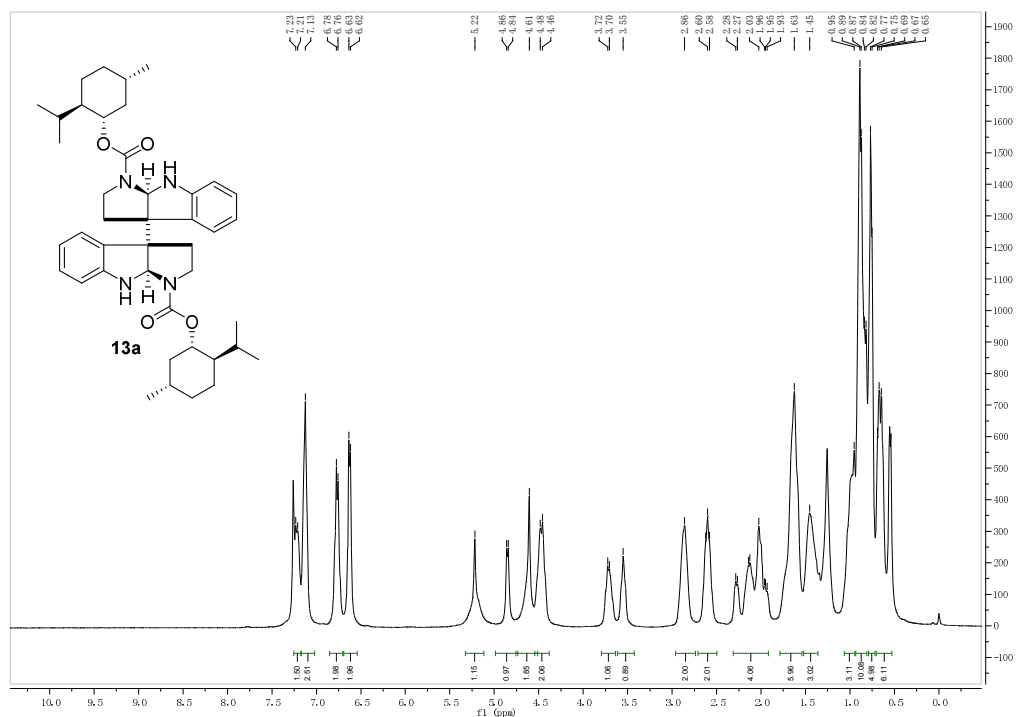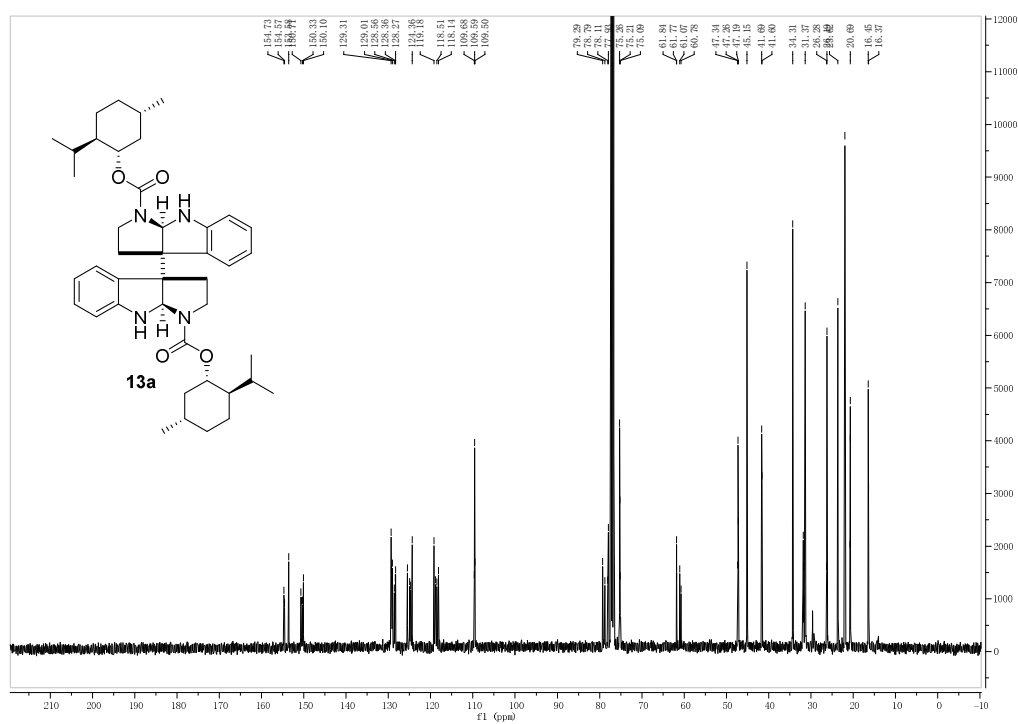

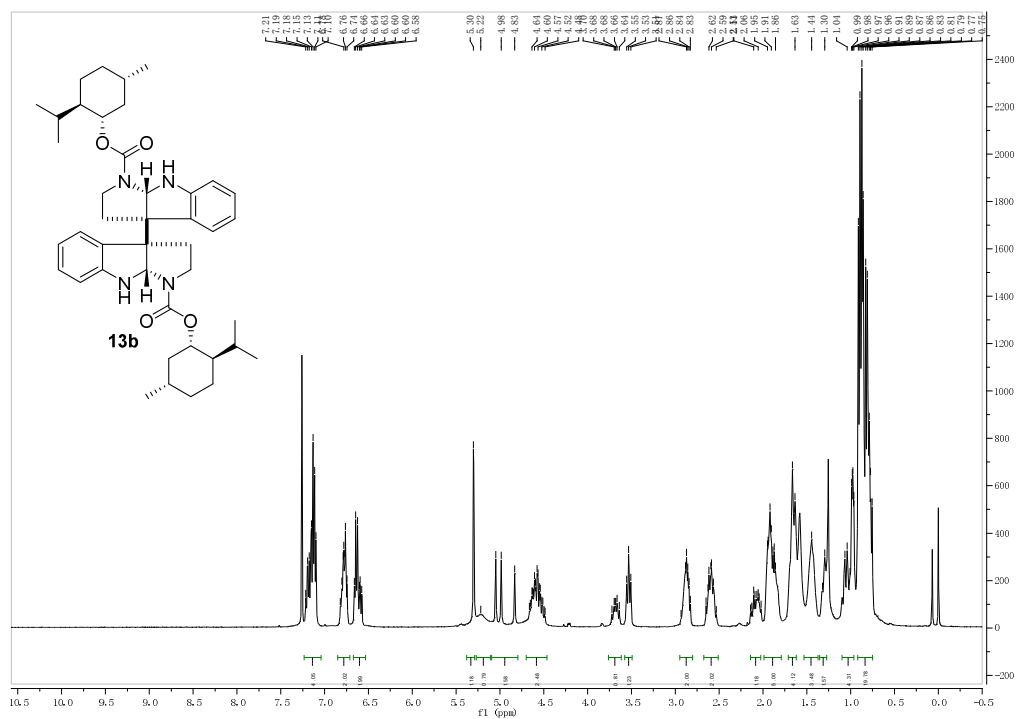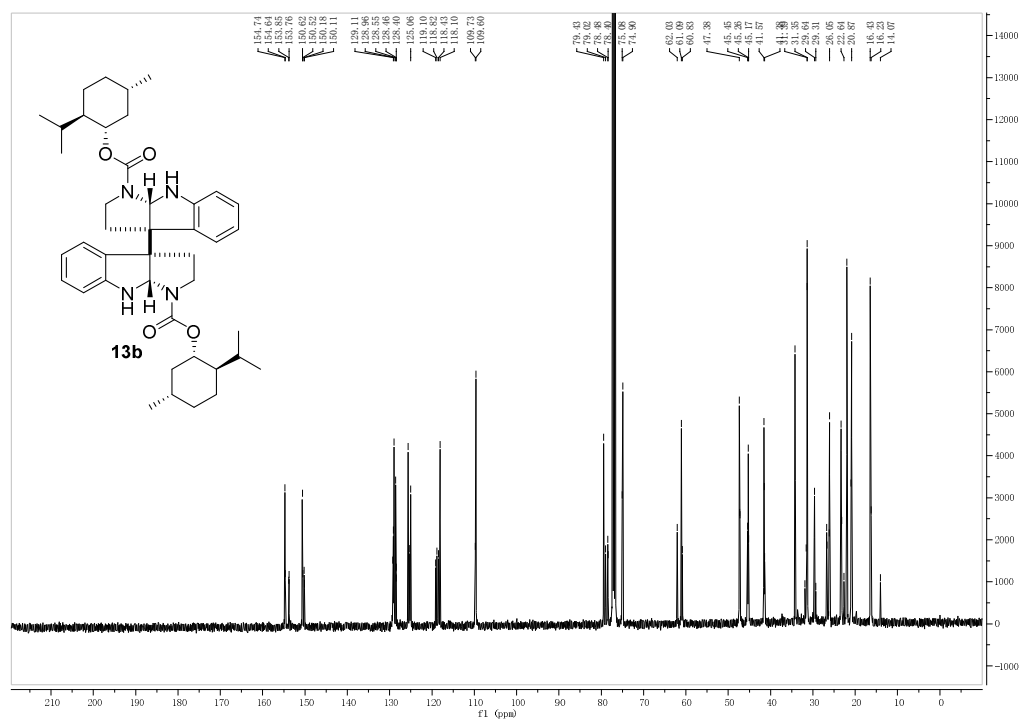



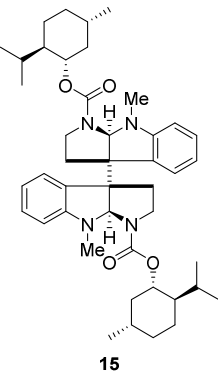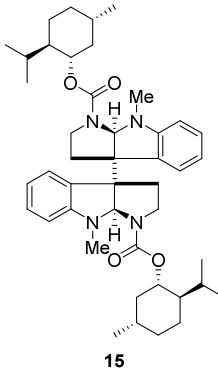

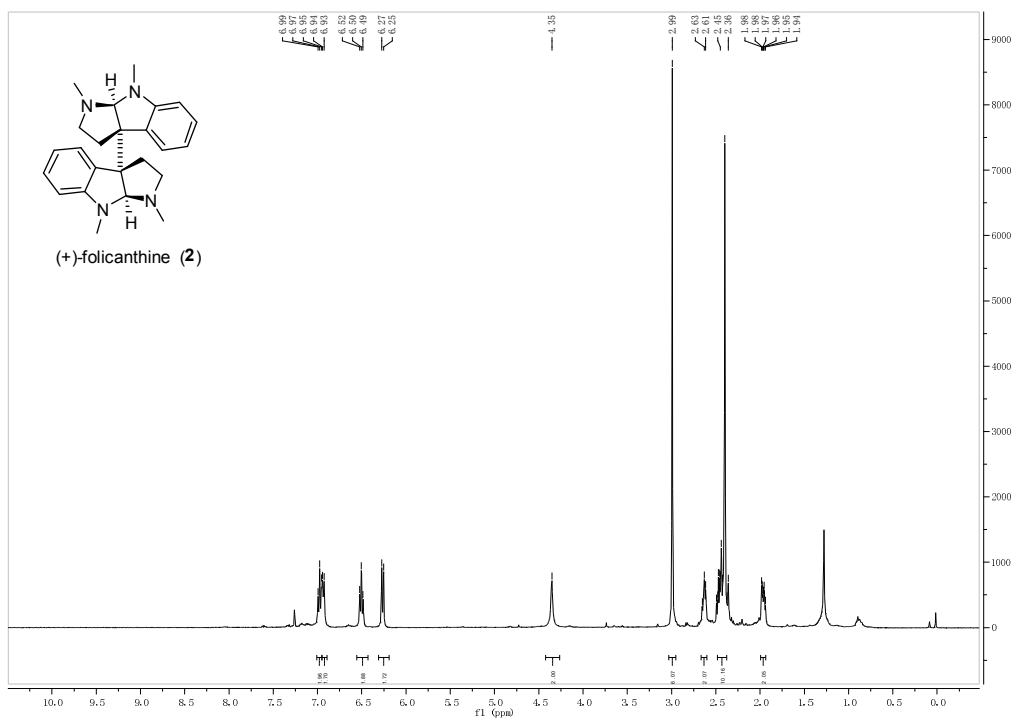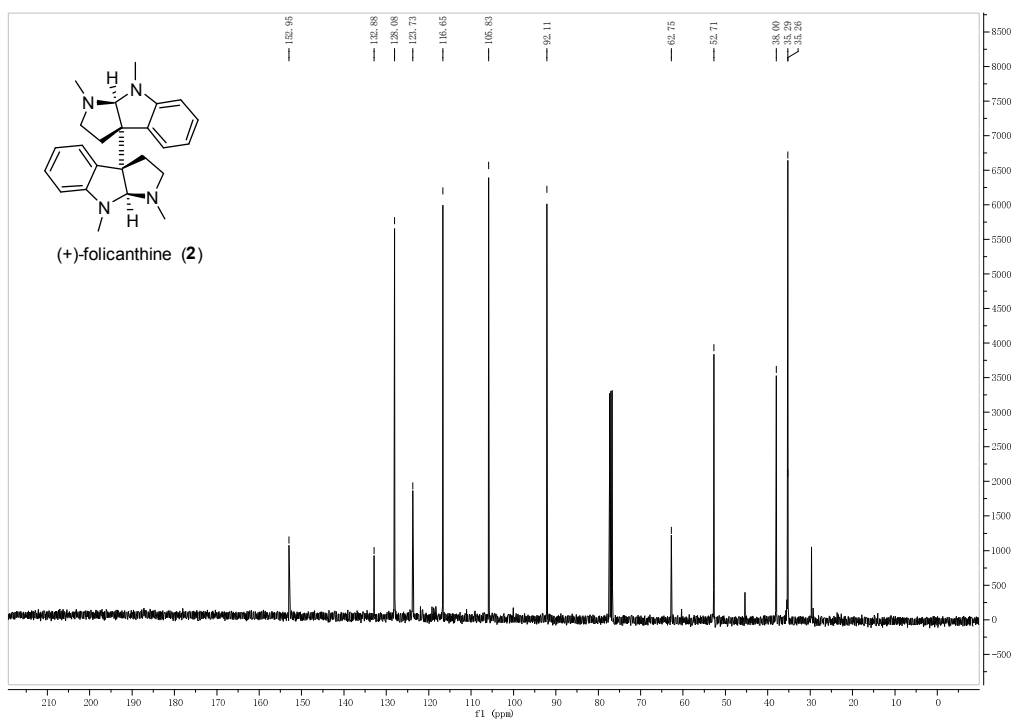

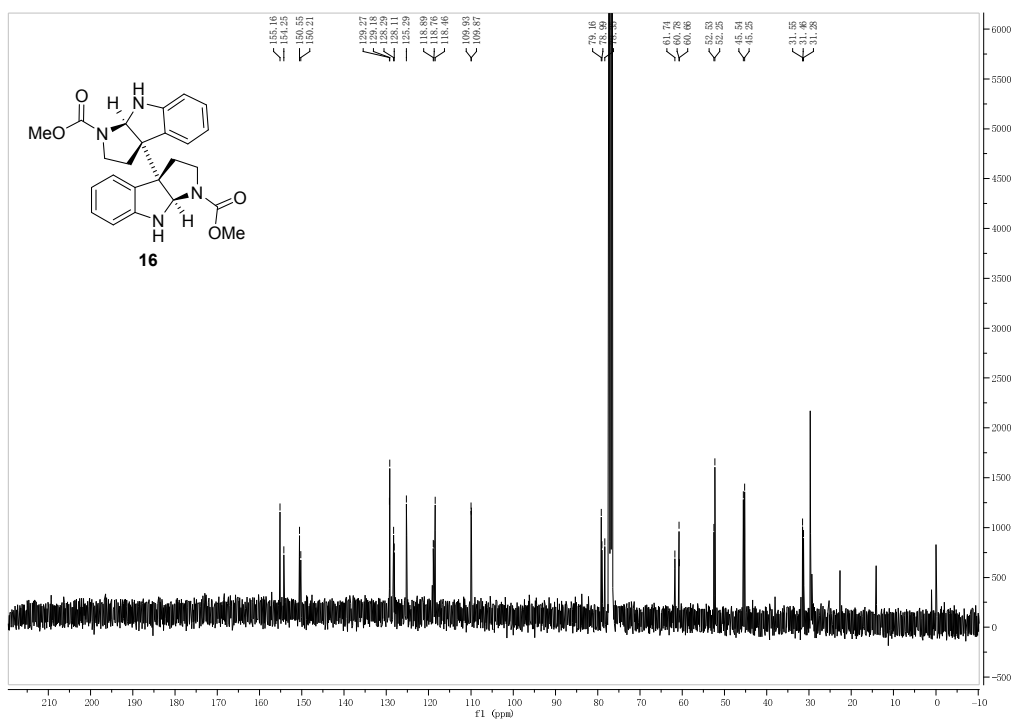



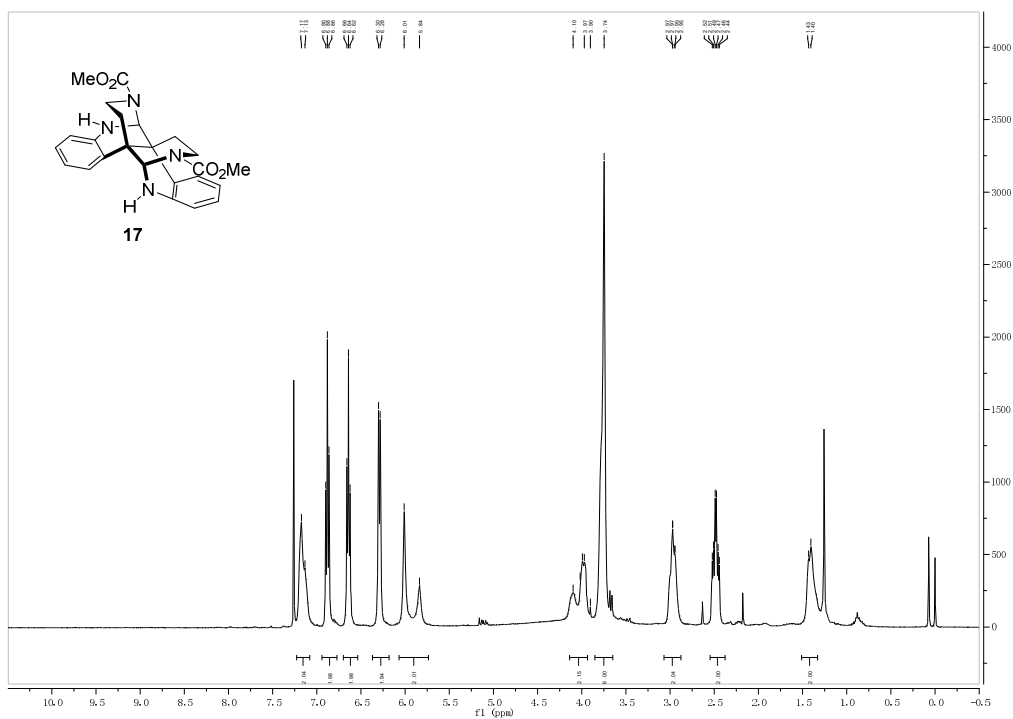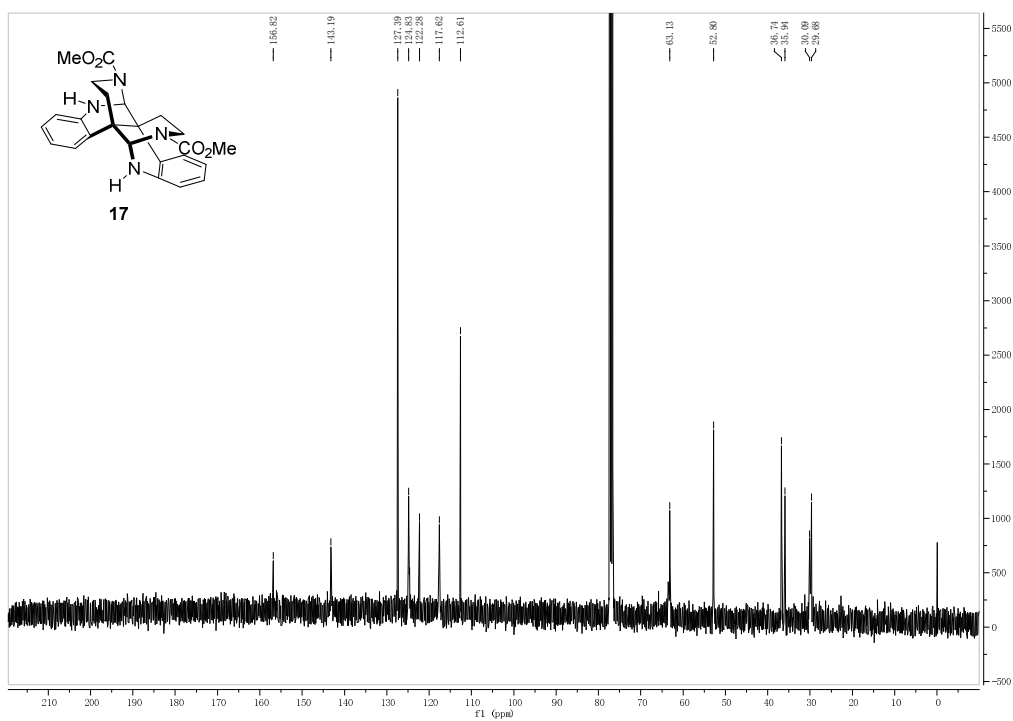

Supplement: Supplementary file 1 [file 3754717]
